# Anti- $\beta_2$ -microglobulin monoclonal antibodies overcome bortezomib resistance in multiple myeloma by inhibiting autophagy

Mingjun Zhang<sup>1,2</sup>, Jin He<sup>1</sup>, Zhiqiang Liu<sup>1</sup>, Yong Lu<sup>1,2</sup>, Yuhuan Zheng<sup>1,2</sup>, Haiyan Li<sup>1,2</sup>, Jingda Xu<sup>1</sup>, Huan Liu<sup>1</sup>, Jianfei Qian<sup>1,2</sup>, Robert Z. Orlowski<sup>1</sup>, Larry W. Kwak<sup>1</sup>, Qing Yi<sup>1,2</sup>, Jing Yang<sup>1,3</sup>

<sup>1</sup>Department of Lymphoma/Myeloma, Division of Cancer Medicine, The University of Texas MD Anderson Cancer Center, Houston, Texas, USA

<sup>2</sup>Department of Cancer Biology, Lerner Research Institute, Cleveland Clinic, Cleveland, Ohio, USA

<sup>3</sup>Cancer Research Institute and Cancer Hospital, Guangzhou Medical University, Guangzhou, China

## Correspondence to:

Jing Yang, e-mail: jiyang@mdanderson.org

Qing Yi, e-mail: yiq@ccf.org

**Keywords:** multiple myeloma, anti- $\beta_2$ M monoclonal antibody, bortezomib, autophagy, NF- $\kappa$  p65

**Received:** November 17, 2014

**Accepted:** January 29, 2015

**Published:** March 31, 2015

## ABSTRACT

Our previous studies showed that anti- $\beta_2$ M monoclonal antibodies (mAbs) have strong and direct apoptotic effects on multiple myeloma (MM) cells, suggesting that anti- $\beta_2$ M mAbs might be developed as a novel therapeutic agent. In this study, we investigated the anti-MM effects of combination treatment with anti- $\beta_2$ M mAbs and bortezomib (BTZ). Our results showed that anti- $\beta_2$ M mAbs enhanced BTZ-induced apoptosis of MM cell lines and primary MM cells. Combination treatment could also induce apoptosis of BTZ-resistant MM cells, and the enhanced effect depended on the surface expression of  $\beta_2$ M on MM cells. BTZ up-regulated the expression of autophagy proteins, whereas combination with anti- $\beta_2$ M mAbs inhibited autophagy. Sequence analysis of the promoter region of *beclin 1* identified 3 putative NF- $\kappa$ B-binding sites from -615 to -789 bp. BTZ treatment increased, whereas combination with anti- $\beta_2$ M mAbs reduced, NF- $\kappa$ B transcription activities in MM cells, and combination treatment inhibited NF- $\kappa$ B p65 binding to the *beclin 1* promoter. Furthermore, anti- $\beta_2$ M mAbs and BTZ combination treatment had anti-MM activities in an established MM mouse model. Thus, our studies provide new insight and support for the clinical development of an anti- $\beta_2$ M mAb and BTZ combination treatment to overcome BTZ drug resistance and improve MM patient survival.

## INTRODUCTION

Multiple myeloma (MM) is a clonal plasma cell neoplasm that utilizes the bone marrow (BM) microenvironment for survival and proliferation [1–3]. Current MM therapies are rarely curative, and relapse is common. Such failure implies that therapy-resistant, MM-initiating cells exist and that new therapeutics must be developed to target and eradicate these chemoresistant MM cells.

Bortezomib (BTZ) is a proteasome inhibitor used worldwide to treat MM and mantle cell lymphoma [4]. However, adverse effects and drug resistance are emerging as great challenges for its extended application [5]. Cell

death and survival are regulated by the crosstalk between apoptosis and autophagy [6], and autophagy activation inhibits apoptosis through reducing caspase cleavage [7, 8]. Recent studies have shown that autophagy activation plays a role in chemotherapy drug resistance in patients with cancer [9]. In particular, BTZ treatment activates autophagy in tumor cells [10, 11]. BTZ-induced autophagy is important in BTZ drug resistance in breast cancer, suggesting that inhibiting autophagy may overcome BTZ-induced drug resistance [9].

Targeted immunotherapy with monoclonal antibodies (mAbs) is an effective and safe cancer treatment. Recent efforts have identified potential therapeutic mAbs by defining alternative or novel MM

target antigens, i.e., CD40 [12, 13], interleukin-6 receptor [14], HM1.24 [15, 16], CD74 [17], CD47 [18], TRAIL-R1 [19], CS1 [20], PD-1 [21], as well as by conjugating mAbs with classic or novel drugs to specifically kill MM cells, i.e., CD56-maytansinoid (DM1) [22], CD138-DM1/DM4 [23]. Because most of these antibodies have little activity clinically in myeloma, the development of mAbs with improved cytotoxicity, targeting new and known MM-associated antigens, continues to be an active research area.

$\beta_2$ -microglobulin ( $\beta_2$ M) is a part of the major histocompatibility complex (MHC) class I molecule [24]. We recently demonstrated that human  $\beta_2$ M is a potential target for MM treatment [25, 26]. Our previous studies showed that anti- $\beta_2$ M mAbs have strong and direct apoptotic effects on MM and other hematological malignancies, with less toxicity to normal tissues and cells [25, 27], suggesting that anti- $\beta_2$ M mAbs might be a novel therapeutic agent for MM. Furthermore, others have reported similar results using an anti-MHC class-I single-chain Fv diabody or anti- $\beta_2$ M antibodies to induce apoptosis in human MM [28] and other cancers [29, 30].

Here, we examined the anti-MM effects of combination treatment with anti- $\beta_2$ M mAbs and BTZ. Combination treatment inhibited BTZ-induced autophagy and increased MM cell apoptosis to overcome BTZ resistance. These results support the clinical development of anti- $\beta_2$ M mAb and BTZ combination treatment to improve MM patient outcomes.

## RESULTS

### Anti- $\beta_2$ M mAbs enhance the effects of BTZ on MM cell apoptosis

To investigate the combination effects of anti- $\beta_2$ M mAbs and BTZ, MM cells were cultured in medium with different concentrations of BTZ (0 nM to 40 nM) alone or in combination with anti- $\beta_2$ M mAbs (10  $\mu$ g/mL) for 24 hours. Annexin-V binding assay showed that BTZ at lower concentrations (5 nM and 10 nM) in combination with the mAbs significantly enhanced apoptosis of ARP-1 (Figure 1A) and MM.1S (Figure 1B) cells. Treatment with high concentrations of BTZ (20 nM and 40 nM) alone had strong anti-MM effects, but combination with the mAbs had no synergistic effects (Figure 1A and 1B;  $P < 0.01$ ). Next, MM cells were cultured with various anti- $\beta_2$ M mAb concentrations (0  $\mu$ g/mL to 50  $\mu$ g/mL), either alone or in combination with a low (5 nM) BTZ concentration for 24 hours. Combination treatment significantly enhanced apoptosis of ARP-1 (Figure 1C) and MM.1S (Figure 1D) cells in an anti- $\beta_2$ M mAb dose-dependent manner ( $P < 0.01$ , compared with mAb treatment alone). Combination of anti- $\beta_2$ M mAbs (10  $\mu$ g/mL) and BTZ (5 nM) was further evaluated in the MM cell lines ARK, ARP-1, MM.1S, and U266 in a 24-hour treatment. Compared to BTZ alone,

combination treatment induced enhanced apoptosis by 1.5-fold in all examined MM cell lines (Figure 1E;  $P < 0.01$ ). In line with these results, after 24-hour treatment, purified primary CD138<sup>+</sup> MM cells isolated from 3 patients with MM were more sensitive to the combination treatment than BTZ treatment alone. Two other patients with relapse who had received BTZ were considered as BTZ-resistant. In these MM patient cells, BTZ treatment alone was ineffective whereas combination with anti- $\beta_2$ M mAbs increased apoptosis (Figure 1F, patients 4 and 5). Taken together, these results demonstrate that anti- $\beta_2$ M mAbs combined with BTZ is more effective against MM cells than BTZ treatment alone.

The Chou-Talalay combination index (CI) offers quantitative definitions for additive effect (CI = 1), synergism (CI < 1), and antagonism (CI > 1) in drug combinations. We applied the CI-isobol equation to study drug interactions between BTZ and anti- $\beta_2$ M mAbs. As shown in Supplementary Figure S1, combining BTZ and anti- $\beta_2$ M mAb has a synergistic effect (CI < 1) at a low concentration (fraction affected (*fa*) < 0.45). Therefore, we used low concentrations of BTZ (5 nM) and anti- $\beta_2$ M mAbs (10  $\mu$ g/mL) in the following experiments.

### The combination of anti- $\beta_2$ M mAbs and BTZ overcomes BTZ resistance

To investigate whether combining anti- $\beta_2$ M mAbs and BTZ enhances the anti-MM effects of BTZ in BTZ-resistant MM cells, we used BTZ-sensitive (KAS-6.wt and OPM-2.wt) and BTZ-resistant (KAS-6.BR and OPM-2.BR) MM cells [31]. First, we confirmed cell sensitivity to BTZ treatment, observing that BTZ treatment induced apoptosis of BTZ-sensitive cells in a dose-dependent manner, but did not induce apoptosis of BTZ-resistant cells (Figure 2A and 2C;  $P < 0.01$ ). Next, we analyzed apoptosis of BTZ-sensitive and BTZ-resistant MM cells treated with BTZ or anti- $\beta_2$ M mAbs, alone or in combination. After 24-hour treatment, BTZ was effective in BTZ-sensitive cells but not in BTZ-resistant cells, whereas combining BTZ with anti- $\beta_2$ M mAbs induced apoptosis in both BTZ-sensitive and BTZ-resistant cells, and was more efficacious than BTZ treatment alone (Figure 2B and 2D;  $P < 0.01$ ). These results indicate that combining anti- $\beta_2$ M mAbs with BTZ overcomes BTZ resistance in MM.

### Effects of combination treatment depends on MM cell $\beta_2$ M expression

To evaluate the significance of MM cell  $\beta_2$ M expression in anti- $\beta_2$ M mAb and BTZ combination treatment-induced MM apoptosis, we used  $\beta_2$ M short-hairpin RNA (shRNA)-lentiviral or  $\beta_2$ M open reading frame (ORF)-lentiviral systems to knockdown or overexpress  $\beta_2$ M, respectively, in MM cells.  $\beta_2$ M expression was evaluated by Western blotting, quantitative real-time polymerase chain reaction

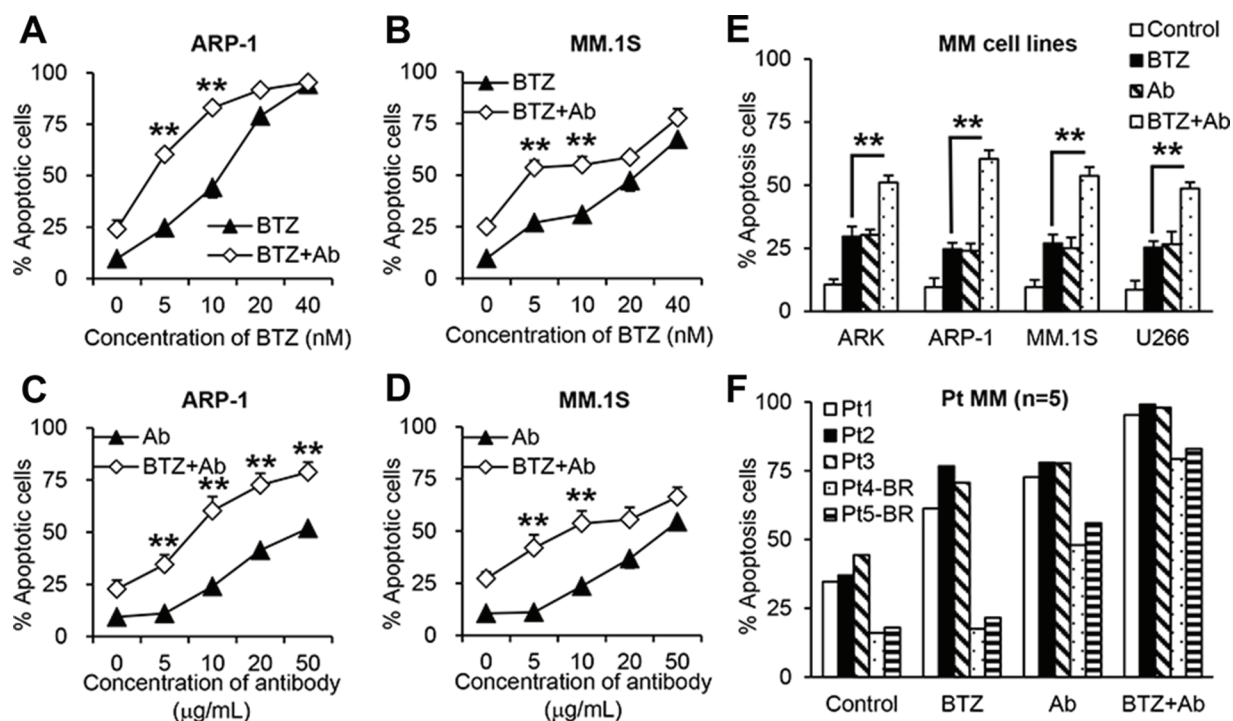

**Figure 1: Anti- $\beta_2$ M mAbs and BTZ combination treatment in MM cells.** 10  $\mu$ g/mL anti- $\beta_2$ M mAbs were combined with various concentrations of BTZ in ARP-1. (A) and MM.1S (B) cells. 5 nM BTZ combined with various concentrations of anti- $\beta_2$ M mAbs in ARP-1 (C) and MM.1S (D) cells. (E) Anti- $\beta_2$ M mAbs combined with BTZ in different MM cell lines. (F) Anti- $\beta_2$ M mAbs combined with BTZ in CD138<sup>+</sup> patient (Pt) MM cells isolated from three BTZ-sensitive MM patients and two BTZ-resistant (BR) MM patients. After 24 hours of treatment, cell apoptosis was monitored by annexin-V binding assay. In E and F, 5 nM BTZ and 10  $\mu$ g/mL anti- $\beta_2$ M mAbs was used. Summarized data from three independent experiments are shown. \*\* $P < 0.01$ .

(qPCR), enzyme-linked immunosorbent assay (ELISA), and flow cytometry. Significant reductions or increases in  $\beta_2$ M protein (Supplementary Figure S2A and S2B) and mRNA (Supplementary Figure S2C and S2D) were observed in  $\beta_2$ M shRNA- or  $\beta_2$ M ORF-expressing ARP-1 and MM.1S cells compared with non-specific shRNA or control vector cells ( $P < 0.01$ ). In addition,  $\beta_2$ M shRNA-expressing ARP-1 cells secreted significantly less soluble  $\beta_2$ M whereas  $\beta_2$ M ORF-expressing ARP-1 cells secreted more compared with control cells (Supplementary Figure S2E;  $P < 0.01$ ). Flow cytometry analysis showed a 70% reduction in  $\beta_2$ M shRNA-ARP-1 cells whereas  $\beta_2$ M ORF-ARP-1 cells had a 2-fold increase in surface expression of  $\beta_2$ M (Supplementary Figure S2F) and HLA-ABC (Supplementary Figure S2G) compared with control cells ( $P < 0.01$ ).

Next, the effects of anti- $\beta_2$ M mAb or BTZ treatment, singly or in combination, on MM cell apoptosis were examined in  $\beta_2$ M-knockdown and  $\beta_2$ M-overexpressing MM cells. After 24-hour treatment, anti- $\beta_2$ M mAb treatment alone induced apoptosis of control cells and enhanced apoptosis of  $\beta_2$ M-overexpressing cells, but reduced apoptosis in  $\beta_2$ M-knockdown cells; BTZ treatment alone induced apoptosis in all tested cells (Figure 3). Combination treatment did not enhance apoptosis in  $\beta_2$ M-knockdown cells (Figure 3A and 3C) but did in  $\beta_2$ M-overexpressing cells (Figure 3B and 3D), as

compared with BTZ treated-only cells ( $P < 0.01$ ). These results indicate that the enhanced effects of combination treatment depend on MM cell  $\beta_2$ M expression.

### Combination of anti- $\beta_2$ M mAbs and BTZ reduces BTZ-induced autophagy

To further determine the enhanced effects of combination treatment on MM cell apoptosis, we evaluated caspase cascades in MM cells treated for 24 hours. In ARP-1 and MM.1S cells, BTZ or anti- $\beta_2$ M mAb treatment alone resulted in an accumulation of cleaved caspase 9, caspase 3, and PARP, and the combination treatment enhanced the caspase cleavage (Figure 4A). These findings were in line with the annexin-V binding assay results (Figure 1) and suggest that anti- $\beta_2$ M mAbs plus BTZ enhances caspase activation in MM cells.

Cell death and survival are regulated by the crosstalk between apoptosis and autophagy [32]. Recent studies have shown that autophagy activation plays a role in BTZ drug resistance in patients with cancer [11]. We therefore determined the effects of 24-hour anti- $\beta_2$ M mAb and BTZ combination treatment on autophagy activation. Treatment with BTZ alone up-regulated the expression of autophagy proteins LAMP-1, Beclin 1, and LC3B, whereas treatment with anti- $\beta_2$ M mAbs alone or in combination with BTZ

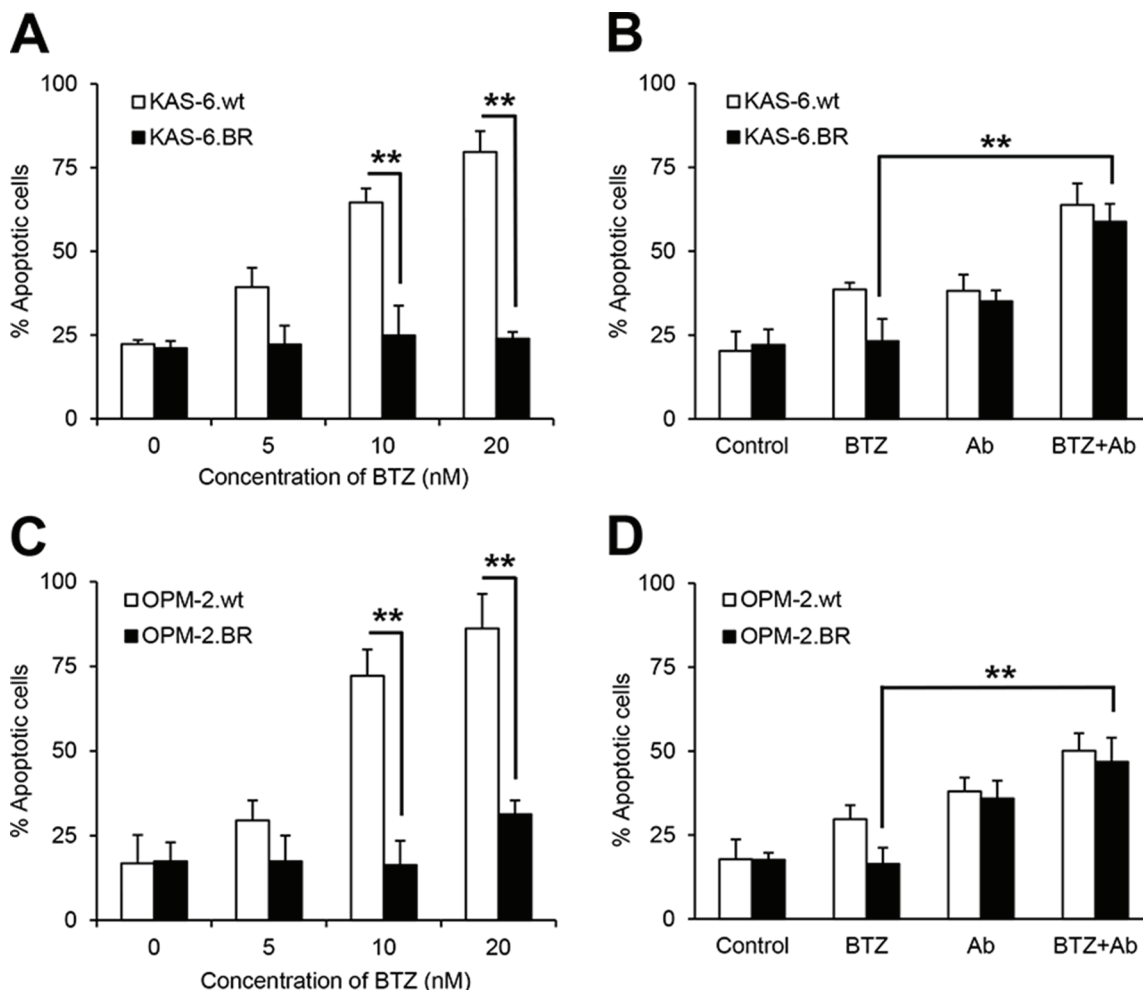

**Figure 2: Combination of anti- $\beta_2$ M mAbs and BTZ restores the sensitivity of BTZ-resistant MM cells to BTZ treatment.** Wild type (wt) or BTZ-resistant (BR) KAS-6 (A and B) and OPM-2 (C and D) cells were cultured in medium with the addition of BTZ or anti- $\beta_2$ M mAbs, singly or in combination, for 24 hours. MM cell apoptosis was monitored by annexin-V binding assay. The percentage of cells undergoing apoptosis increased in a dose-dependent manner in the BTZ-sensitive cells, with no change in the percentage undergoing apoptosis in BTZ-resistant KAS-6 cells (A) and OPM-2 cells (C), treated with various BTZ concentrations. Also shown is the increase in the percentage of cells undergoing apoptosis in either wild type or BTZ-resistant KAS-6 (B) and OPM-2 (D) cells, treated with the combination of BTZ (5 nM) and anti- $\beta_2$ M mAbs (10  $\mu$ g/mL), compared with cells treated with BTZ only. Summarized data from three independent experiments are shown. \*\* $P < 0.01$ .

decreased expression in ARP-1 and MM.1S cells (Figure 4B). Next, the effects of anti- $\beta_2$ M mAb or BTZ treatment, singly or in combination for 24 hours, on the expression of autophagy proteins in KAS-6.wt, KAS-6.BR, OPM2.wt, and OPM2.BR cells were examined. As shown in Figure 4C, autophagy protein expression was higher in BTZ-resistant cell lines compared with BTZ-sensitive cell lines. BTZ treatment alone up-regulated the expression of LAMP-1, Beclin 1, and LC3B whereas anti- $\beta_2$ M mAb treatment alone or combined with BZT down-regulated the expression in both BTZ-resistant and -sensitive cell lines. These results indicated that combining anti- $\beta_2$ M mAbs and BTZ overcomes BTZ-induced autophagy in both BTZ-resistant and -sensitive MM cells.

To determine which autophagy proteins mediate BTZ resistance, we rescued LAMP-1, Beclin 1, and LC3B

expression in ARP-1 cells by infection with lentivirus containing human LAMP1, Beclin-1, or LC3B ORFs, respectively. After 24-hour treatment, rescuing Beclin 1, but not LC3B or LAMP-1, reduced apoptosis in ARP-1 cells treated with anti- $\beta_2$ M mAbs alone or in combination with BTZ (Figure 4D), indicating that Beclin 1 is responsible for the anti- $\beta_2$ M mAb-induced inhibition of autophagy.

### Combination treatment down-regulates autophagy by inhibiting BTZ-activated NF- $\kappa$ B p65 signaling

Constitutive NF- $\kappa$ B activity in cancer cells can induce BTZ resistance [33, 34]. Therefore, we wondered whether anti- $\beta_2$ M mAbs inhibited BTZ-induced autophagy by inhibiting NF- $\kappa$ B signaling. After 24-hour treatment,

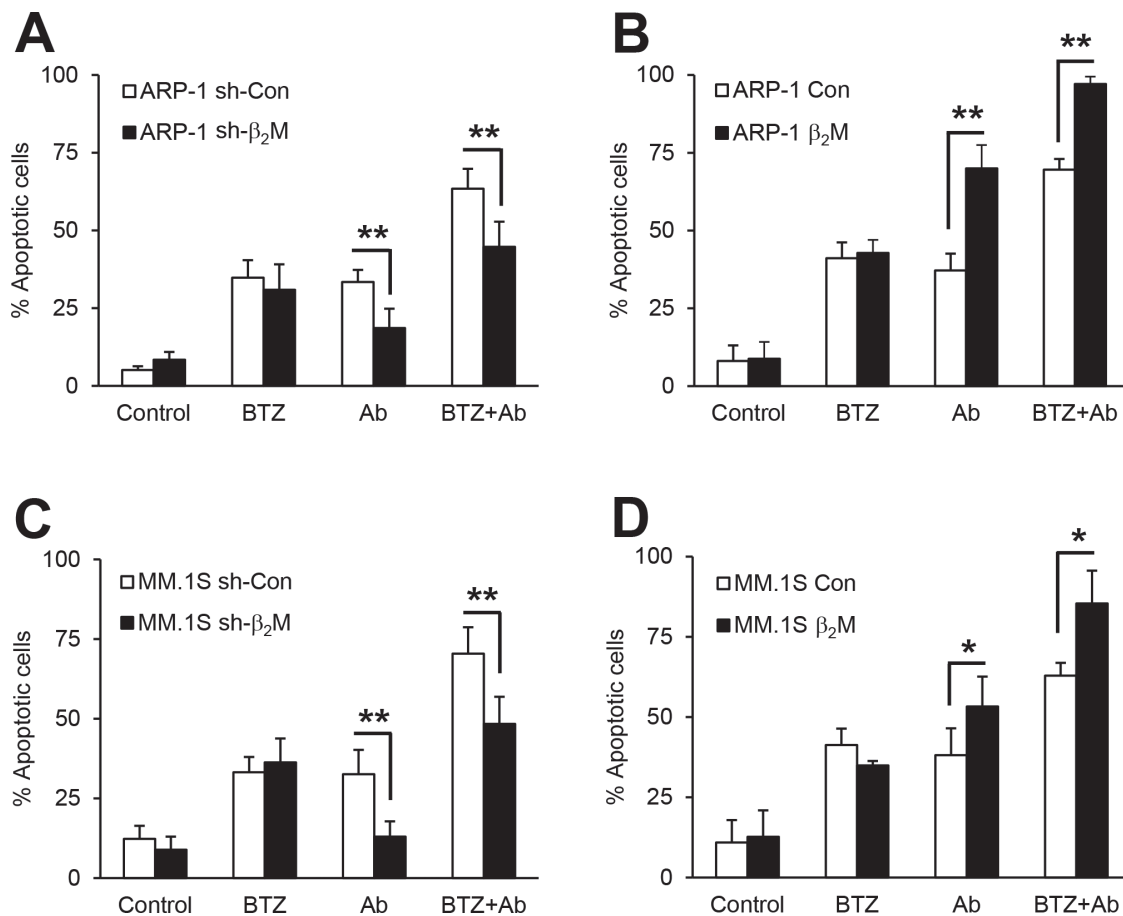

**Figure 3: The efficacy of anti- $\beta_2M$  mAbs and BTZ combination treatment in  $\beta_2M$ -knockdown and  $\beta_2M$ -overexpression MM cells.** Non-specific (sh-con) or  $\beta_2M$  shRNA (sh- $\beta_2M$ )-expressing, and stable control vector (con) or human  $\beta_2M$  cDNA ( $\beta_2M$ )-expressing ARP-1 (A and B) and MM.1S (C and D) cells were cultured in medium with or without addition of BTZ (5 nM) or anti- $\beta_2M$  mAbs (10  $\mu$ g/mL), singly or in combination for 24 hours. Apoptosis was reduced in  $\beta_2M$  shRNA-expressing ARP-1 (A) and MM.1S (C) cells receiving combination treatment compared with cells treated with BTZ only. Apoptosis was enhanced in  $\beta_2M$ -overexpressing ARP-1 (B) and MM.1S (D) cells receiving combination treatment, compared with cells treated with BTZ only. Summarized data from three independent experiments are shown. \* $P < 0.05$ , \*\* $P < 0.01$ .

cytoplasmic and nuclear protein fractions of ARP-1 and MM.1S cells were extracted and detected by Western blotting. As shown in Figure 5A, BTZ treatment alone induced the translocation of NF- $\kappa$ B p65 into nuclei, whereas anti- $\beta_2M$  mAb treatment alone or in combination with BTZ had no such effect. In addition, BTZ treatment alone increased the phosphorylation levels of p65 and I $\kappa$ B- $\alpha$  in ARP-1, MM.1S, OPM-2.wt, and OPM-2.BR cells after 24-hour treatment, whereas anti- $\beta_2M$  mAb treatment alone or in combination with BTZ reduced the levels of phosphorylated p65 and I $\kappa$ B- $\alpha$  (Figure 5B). These results indicate that BTZ alone activates NF- $\kappa$ B signaling, whereas anti- $\beta_2M$  mAb and BTZ combination treatment reduces the signaling.

### Combination treatment inhibits BTZ-induced NF- $\kappa$ B p65 binding to the *beclin 1* promoter

Sequence analysis of the *beclin 1* promoter region showed 3 putative NF- $\kappa$ B binding sites from -615 to -789

bp (Figure 5C). Chromatin immunoprecipitation (ChIP) assay verified that 24-hour treatment with BTZ treatment alone up-regulated p65 binding to the *beclin 1* promoter in ARP-1 cells, but anti- $\beta_2M$  mAb treatment alone or in combination with BTZ reduced the binding (Figure 5D). To further confirm that BTZ induced p65 binding to the *beclin 1* promoter, electrophoretic mobility shift assay (EMSA) was performed. As shown in Supplementary Figure S3, after 24-hour treatment, potential #2 probe could bind to ARP-1 nuclear proteins, but potential #1 and potential #3 probes could not. Further analysis of the potential #2 probe confirmed an intense band in the BTZ treatment group, but only faint bands in the anti- $\beta_2M$  mAb and combination treatment groups (Figure 5E and Supplementary Figure S3), indicating that BTZ treatment enhanced protein binding to the *beclin 1* promoter but anti- $\beta_2M$  mAbs or combination treatment inhibited the binding. For DNA competition experiments, the inducible band could be shifted off completely by unlabeled potential #2 probe, but not by unlabeled mutant potential #2 probe (Figure 5E). After

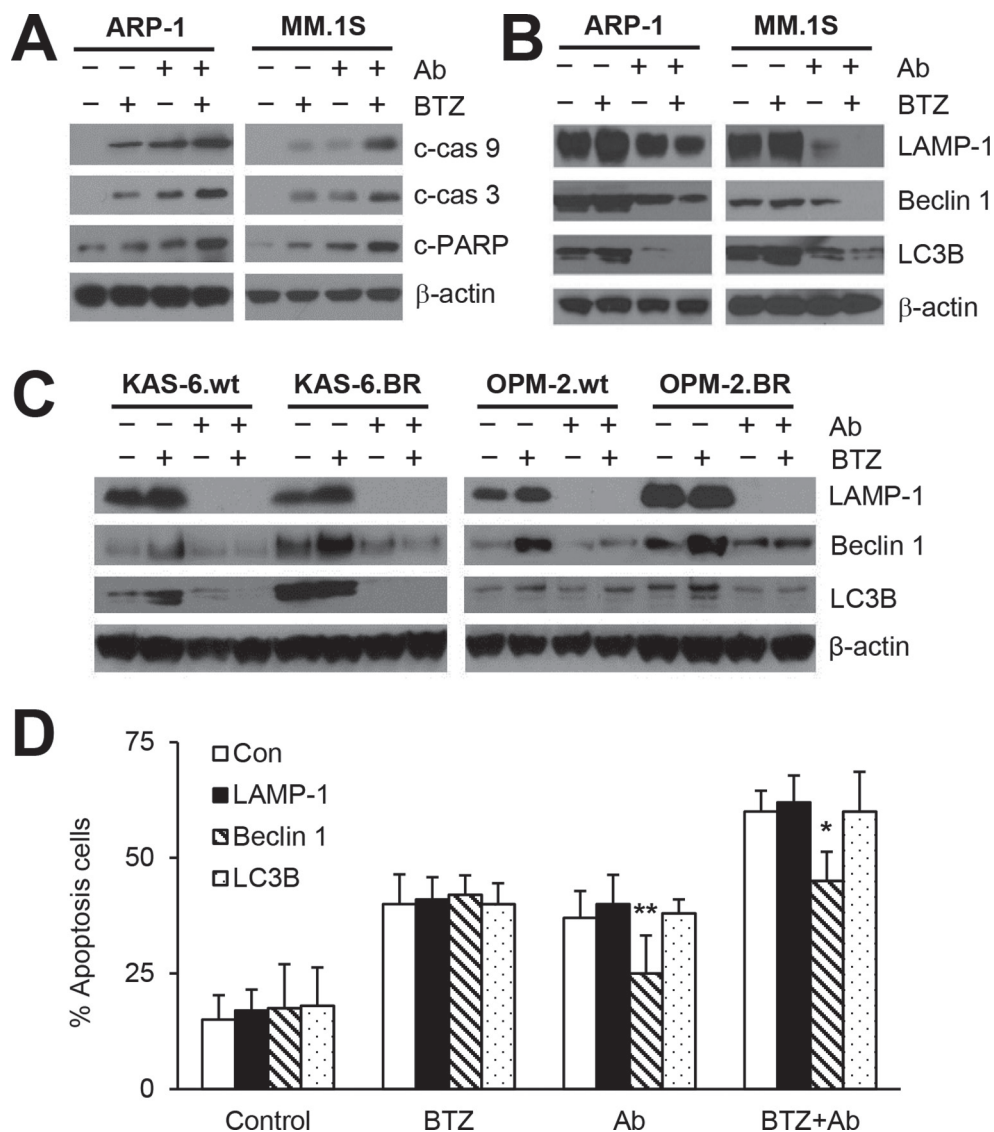

**Figure 4: Anti- $\beta_2$ M mAbs and BTZ combination treatment reduces BTZ-induced autophagy activation.** MM cells were cultured in medium with or without addition of BTZ (5 nM) or anti- $\beta_2$ M mAbs (10  $\mu$ g/mL), singly or in combination for 24 hours. Representative images of Western blot analysis (A) showing the levels of cleaved caspase 9 (c-cas9), caspase 3 (c-cas3), and PARP (c-PARP) in ARP-1 and MM.1S cells. Representative images of Western blot analysis showing the levels of the autophagy proteins LAMP-1, Beclin-1, and LC3B in (B) ARP-1 and MM.1S cells and (C) KAS-6.wt, KAS-6.BR, OPM-2.wt, and OPM-2.BR cells. (D) Annexin-V binding assay showing that rescuing Beclin 1 but not LC3B or LAMP-1 reduced apoptosis in ARP-1 cells treated with anti- $\beta_2$ M mAbs alone or with mAbs plus BTZ. The experiments were carried out in triplicate.  $\beta$ -actin served as protein loading control. \* $P < 0.05$ , \*\* $P < 0.01$ .

BTZ treatment, p65 antibody supershifted the identified band, indicating that BTZ presence leads to p65 binding of the *beclin 1* promoter (Figure 5F). These results indicate that anti- $\beta_2$ M mAbs reduce BTZ-induced autophagy by inhibiting NF- $\kappa$ B p65 binding to the *beclin 1* promoter.

In addition, rescuing p65 by lentiviral infection of human p65 ORF treated with anti- $\beta_2$ M mAbs alone or combined with BTZ for 24 hours reduced apoptosis, whereas knocking down p65 by lentiviral infection with human p65 shRNA increased apoptosis of ARP-1 cells (Figure 5G). Taken together, these results indicate that anti- $\beta_2$ M mAbs enhanced BTZ treatment efficacy via an NF- $\kappa$ B–Beclin 1 signaling pathway.

#### Anti- $\beta_2$ M mAbs enhance the anti-MM effects of BTZ *in vivo*

We examined the therapeutic effects of anti- $\beta_2$ M mAb and BTZ combination treatment *in vivo* in a xenograft MM SCID mouse model. To detect the effects of combination treatment, low and nontherapeutic doses of BTZ and anti- $\beta_2$ M mAbs were chosen based on our previous studies [25, 35]. Although treatment with anti- $\beta_2$ M mAbs or BTZ reduced tumor volume ( $P < 0.05$ , versus control mice), combination treatment was more efficacious than BTZ alone (Figure 6A and 6B;  $P < 0.01$ ). Tumor burden was further assessed by measuring serum M-protein levels by ELISA

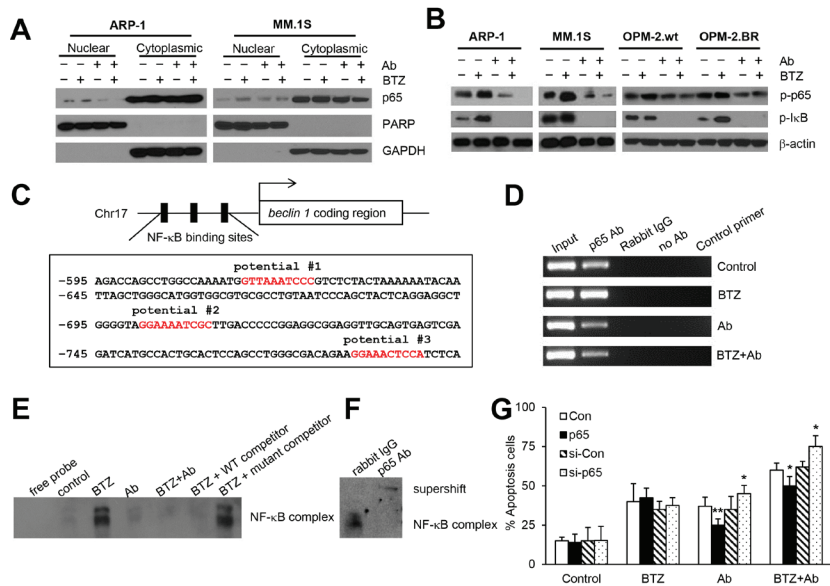

**Figure 5: Anti- $\beta_2$ M mAbs and BTZ combination treatment down-regulates BTZ-induced NF- $\kappa$ B p65 activity.** After 24 hours of treatment with BTZ or anti- $\beta_2$ M mAbs, singly or in a combination, MM cells were harvested and the cytoplasmic and nuclear proteins were extracted. **(A)** Representative images of Western blot analysis showing nuclear and cytoplasmic NF- $\kappa$ B p65 in ARP-1 and MM.1S cells. PARP and GAPDH served as nuclear and cytoplasmic loading controls, respectively. **(B)** Representative images of Western blot analysis showing phosphorylated NF- $\kappa$ B p65 and phosphorylated I $\kappa$ B- $\alpha$  in ARP-1, MM.1S, OPM-2.wt, and OPM-2.BR cells.  $\beta$ -actin served as a protein loading control. **(C)** Schematic diagram of NF- $\kappa$ B binding sites in the *beclin 1* promoter region. The locations of three potential NF- $\kappa$ B binding sites are indicated. **(D)** Representative ChIP assay images showing the ability of NF- $\kappa$ B p65 to bind to the *beclin 1* promoter in BTZ-, mAb- or mAb plus BTZ-treated ARP-1 cells. Chromatin was extracted from the treated cells, and the DNA was precipitated with p65 antibody, then analyzed by qPCR. The input served as an internal control, and samples treated with rabbit IgG, or no antibody, or control primer of non-transcribed region served as negative controls. Nuclear proteins were extracted from ARP-1 cells after 24-hour treatment for EMSA assay. **(E)** Binding of potential #2 probe was presented after BTZ treatment and reduced in the mAb- or combination treatment. Cold competition was performed using unlabeled probes as indicated. **(F)** Supershift assay performed with p65 antibody to investigate the BTZ-induced p65 binding complex to *beclin 1* promoter. Rabbit IgG served as a negative control. **(G)** Rescuing or knocking down p65 in ARP-1 cells showing reduced or enhanced apoptosis by annexin-V binding assay. All experiments were carried out in triplicate. \* $P < 0.05$ , \*\* $P < 0.01$ .

(Figure 6C and 6D;  $P < 0.01$ ). No change in body weight was found in treated groups (data not shown), suggesting that the combination treatment probably had no toxic effect.

Greater numbers of apoptotic tumor cells were detected by TdT-mediated dUTP nick-end labeling (TUNEL) assay in ARP-1 tumor-bearing mice treated with BTZ or anti- $\beta_2$ M mAbs, compared with mice treated with DMSO or mouse IgG1. Anti- $\beta_2$ M mAb and BTZ combination treatment showed additive effects on induction of MM cell apoptosis compared with treatment with BTZ alone (Figure 6E). Immunohistochemistry in ARP-1 tumor-bearing mice revealed that cells positive for Ki67 decreased after combination treatment, and cells positive for cleaved caspase 3 increased after combination treatment, compared with BTZ treatment alone (Figure 6E). These data indicate that combination of anti- $\beta_2$ M mAbs and BTZ enhances BTZ's therapeutic effects against MM *in vivo*.

## DISCUSSION

Chemotherapy is the most effective treatment for MM currently. Several new drugs have been developed to prolong patient survival [36, 37]. However, the application of these

drugs, such as BTZ, usually induces drug resistance, and quick relapse is common [38, 39]. mAbs are emerging as a major new treatment that confers great benefits [40]. In this study, we determined that the combination of anti- $\beta_2$ M mAbs and BTZ was more effective against MM than either agent alone. More importantly, we found that anti- $\beta_2$ M mAbs overcome BTZ resistance by inhibiting BTZ-induced autophagy.

Anti- $\beta_2$ M mAbs enhanced the anti-MM effects of BTZ in a panel of established human MM cell lines and primary MM cells from patients. These findings indicate the potential of anti- $\beta_2$ M mAbs and BTZ combination treatment as a therapeutic strategy against MM. Moreover, anti- $\beta_2$ M mAbs re-sensitized BTZ-resistant MM cells to BTZ treatment, and the enhanced effects of the combination treatment correlated with the expression of surface  $\beta_2$ M on MM cells. Therefore, combination treatment with anti- $\beta_2$ M mAbs and BTZ has the potential to impact a larger and heterogeneous patient population with  $\beta_2$ M-expression, and to be effective in patients with relapse or who develop tumors resistant to conventional treatment with BTZ.

Mechanistic studies showed that the combination of anti- $\beta_2$ M mAbs and BTZ resulted in an accumulation

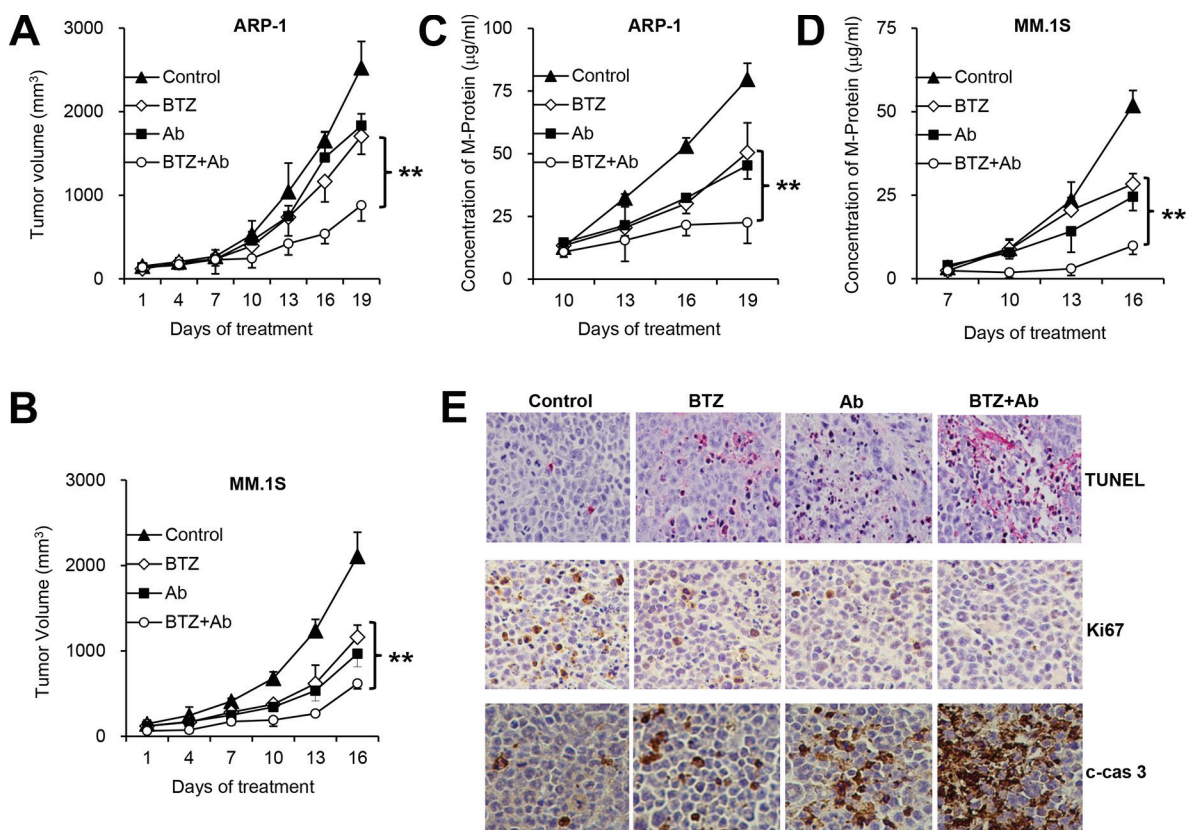

**Figure 6: Anti- $\beta_2$ M mAbs enhance anti-MM effects of BTZ *in vivo*.** Shown are tumor volumes (A, B) and M-protein levels (C, D) in ARP-1 or MM.1S tumor-bearing mice, respectively ( $n=4$ ), treated with mouse IgG1 or DMSO (control), BTZ, anti- $\beta_2$ M mAbs (Ab), or the combination of BTZ and anti- $\beta_2$ M mAbs (BTZ+Ab). ARP-1 or MM.1S cells were subcutaneously injected into SCID mice. At 3 to 4 weeks after MM cell injection, mice were intraperitoneally injected with BTZ (0.1 mg/kg) or subcutaneously around tumors with anti- $\beta_2$ M mAbs (0.6 mg/kg), singly or in combination, every 3 days for 3 weeks. Tumor volumes were measured every 3 days after treatment. The level of circulating human kappa or lambda chain in mouse serum was measured by ELISA. (E) Representative images of *in situ* TUNEL assay and immunohistochemistry of Ki67 and cleaved caspase 3 (c-cas 3) showing MM tumor cell apoptosis and proliferation.  $**P < 0.01$ .

of cleaved caspase 9, caspase 3 and PARP, and inhibition of the autophagy proteins LAMP-1, Beclin 1, and LC3B. Treatment with a low concentration of BTZ had only a minor effect on caspase cleavage but could induce autophagy. Notably, we found that anti- $\beta_2$ M mAbs inhibited BTZ-induced autophagy in a dose-dependent manner (data not shown). Thus, the combination of anti- $\beta_2$ M mAbs and BTZ may provide an approach to overcome BTZ drug resistance through the inhibition of BTZ-induced autophagy.

Recent research demonstrated that BTZ can induce canonical NF- $\kappa$ B activation by down-regulating constitutive I $\kappa$ B- $\alpha$  expression in MM cells [41]. Other studies found that BTZ treatment of primary effusion lymphoma cells failed to inhibit NF- $\kappa$ B activation [42]. In line with these reports, our data showed that BTZ activated NF- $\kappa$ B transcription activity by increasing NF- $\kappa$ B p65 nuclear translocation and p65 phosphorylation in MM cells. The combination of anti- $\beta_2$ M mAbs and BTZ significantly reduced both the NF- $\kappa$ B p65 nuclear translocation and p65 phosphorylation. Other groups have reported novel NF- $\kappa$ B p65 consensus sites in the *beclin 1* promoter and demonstrated that NF- $\kappa$ B p65

positively modulated canonical autophagy in various human tumor cell lines [43]. Our ChIP and EMSA assays verified that anti- $\beta_2$ M mAb treatment inhibited BTZ-induced NF- $\kappa$ B p65 binding to the *beclin 1* promoter.

The enhanced anti-MM effect of the combination therapy was also found *in vivo*. Combination treatment with anti- $\beta_2$ M mAbs and BTZ inhibited tumor growth and serum M-protein level compared with either agent alone. These results underscore a potential clinical development strategy by combining anti- $\beta_2$ M mAbs and BTZ to treat MM patients, which could lower the doses of BTZ and anti- $\beta_2$ M mAbs needed while enhancing their anti-tumor effects, and more importantly, reduce BTZ- and anti- $\beta_2$ M mAb-induced toxicity.

As shown in our schematic diagram of signaling pathways (Supplementary Figure S4), BTZ induces caspase cleavage and apoptosis of MM cells, resulting in drug sensitivity to BTZ treatment. However, BTZ could also enhance *beclin 1* transcription by increasing NF- $\kappa$ B p65 binding to the *beclin 1* promoter, leading to autophagy activation. Activated autophagy inhibits MM



cell apoptosis and promotes cell survival, resulting in drug resistance to BTZ treatment (Supplementary Figure S4A). When BTZ is combined with anti- $\beta_2$ M mAbs, NF- $\kappa$ B p65 transcription activities and BTZ-induced autophagy are inhibited, while caspase cleavage and MM cell apoptosis are increased, resulting in re-sensitization of MM cells to BTZ treatment (Supplementary Figure S4B). Thus, our study strongly suggests that anti- $\beta_2$ M mAbs can overcome BTZ drug resistance in patients.

In conclusion, we for the first time demonstrate that anti- $\beta_2$ M mAbs prevent BTZ drug resistance and enhance BTZ anti-MM efficacy by reducing autophagy protein expression via NF- $\kappa$ B signaling, which provides a rationale for combining these drugs to improve patient outcomes in MM. Thus, our studies provide new insight for the clinical development of anti- $\beta_2$ M mAbs to overcome chemotherapy drug resistance and improve MM patient survival.

## MATERIALS AND METHODS

### Reagents, MM cell lines, and primary MM cells

Anti- $\beta_2$ M mAbs (clone D1) were generated as previously described [25]. Mouse IgG1 (BioLegend) was used as an isotype control. BTZ (PS-341; Millennium) was dissolved in DMSO at 10 mM as a stock solution. Human ARP-1 and ARK cells were established at the University of Arkansas for Medical Sciences from BM aspirates of patients with MM [44], MM.1S was kindly provided by Dr. Steven Rosen of Northwestern University (Chicago, IL), and U266 cells were purchased from the American Type Culture Collection (ATCC). The BTZ-sensitive (wild-type, wt) and BTZ-resistant (BR) MM cell lines KAS-6.wt, KAS-6.BR, OPM-2.wt, and OPM-2.BR were generated by Dr. Robert Z. Orlowski as previously described [31]. Primary CD138<sup>+</sup> MM cells were isolated from BM aspirates of MM patients according to approved IRB protocols of The University of Texas MD Anderson Cancer Center and Cleveland Clinic. All cells were cultured in RPMI-1640 medium supplemented with 10% fetal bovine serum and maintained at 37°C with 5% CO<sub>2</sub>.

### Lentiviral infection of MM cells with shRNA and ORF expression clone transfection

MM cells were infected with lentivirus containing human  $\beta_2$ M or p65 shRNAs or lentivirus containing human  $\beta_2$ M, LAMP1, Beclin-1, LC3B, or p65 ORFs (Genecopoeia) according to the manufacturer's protocol to knockdown or overexpress specific gene, respectively. Non-specific shRNA or control vector was used as controls. Stable cell line screening was performed with 800  $\mu$ g/mL neomycin (Sigma) for 4 weeks, and positive cells were selected.

### Extraction of cytoplasmic and nuclear proteins

MM cell cytoplasmic and nuclear protein fractions were extracted using NE-PER extraction reagents according to the manufacturer's protocol (Pierce Biotechnology). Nuclear protein extracts were used for EMSA. Cytoplasmic and nuclear protein extracts were used for detecting NF- $\kappa$ B p65 by Western blotting. PARP or GAPDH served as a nuclear or cytoplasmic internal control, respectively.

### Western blotting

Western blotting was conducted as previously described [25]. Mouse anti- $\beta_2$ M mAbs (Santa Cruz Biotech) were used to detect  $\beta_2$ M protein. Rabbit polyclonal antibodies against cleaved caspase 9, cleaved caspase 3, cleaved PARP, LAMP-1, Beclin 1, LC3B, non-phosphorylated p65, phosphorylated p65, phosphorylated I $\kappa$ B- $\alpha$ , GAPDH, PARP, and  $\beta$ -actin were obtained from Cell Signaling Technology.

### qPCR

Total RNA was isolated using an RNeasy kit (Qiagen). Total RNA (1  $\mu$ g) was reverse transcribed using a SuperScript II (Invitrogen) reverse transcriptase PCR kit; 1  $\mu$ L of the final cDNA was used for qPCR amplification with SYBRGreen using a StepOnePlus real-time PCR system (Applied Biosciences). The primers for amplification were:  $\beta_2$ M-F 5'-AAT TGA AAA AGT GGA GCA TTC AGA-3';  $\beta_2$ M-R 5'-GGC TGT GAC AAA GTC ACA TGG TT-3'; GAPDH-F 5'-CAC TCC TCC ACC TTT GAC G-3'; and GAPDH-R 5'-ACC ACC CTG TTG CTG TAG C-3'. Gene expression levels were normalized to *GAPDH* levels.

### Analysis of surface $\beta_2$ M and HLA-ABC and cell apoptosis by flow cytometry

APC-conjugated mAbs against human  $\beta_2$ M, HLA-ABC, and isotype control were obtained from BioLegend. An apoptosis assay was performed as previously described [25]. FITC-labeled annexin-V antibody and propidium iodide (PI) were purchased from Life Technologies. Data were acquired with a flow cytometer (FACSCalibur; BD Biosciences).

### ELISA

Cell culture supernatants were collected, and secreted  $\beta_2$ M was quantified with a human  $\beta_2$ M Quantikine IVD ELISA Kit (R&D Systems). Serum M-protein levels were measured in SCID mice injected with ARP-1 by using the Human Kappa ELISA Kit or MM.1S cells using the Human Lambda ELISA Kit (Bethyl Laboratories).

## ChIP assay

ChIP assay was performed with a ChIP assay kit (Millipore) according to the manufacturer's instructions. Chromatin was extracted from ARP-1 cells. Anti-NF- $\kappa$ B p65 antibody and isotype control (Cell Signaling Technology) were used for the chromatin immunoprecipitation. The precipitated DNA was analyzed by qPCR with the following primer sets for the region surrounding the NF- $\kappa$ B binding sites at the *beclin 1* promoter: F 5'-AGA CCA GCC TGG CCA AAA TGG T-3' and R 5'-TGA GAT GGA GTT TCC TTC TGT CG-3'. Values were subtracted from control IgG values and normalized to corresponding input control.

## EMSA

Probes were labeled at the 3' end with biotin (Biotin 3' End DNA Labeling Kit; Pierce Biotechnology), following the manufacturer's instructions. Oligonucleotides used as probe or competitor were synthesized as: potential #1, 5'-AAA TGG TTA AAT CCC GTC TCT A-3'; potential #2, 5'-GGG TAG GAA AAT CGC TTG ACC C-3'; potential #2 mutant, 5'-GGG TAG CAA AAT CCC TTG ACC C-3'; potential #3, 5'-GAC AGA AGG AAA CTC CAT CTC A-3'. EMSA was performed using the LightShift Chemiluminescent EMSA Kit (Pierce Biotechnology). The DNA-protein complexes were separated on 6% native polyacrylamide gels in 0.5% Tris-borate buffer. For DNA competition experiments, a 100-fold molar excess of unlabeled oligonucleotide was added before incubation. For supershift experiments, 2  $\mu$ L of anti-NF- $\kappa$ B p65 antibody or isotype control was added to the completed binding reaction mixture [45].

## *In vivo* tumor xenograft mouse models

Six-week-old male SCID mice (Jackson Laboratory) were injected subcutaneously in the right flank with  $1 \times 10^6$  ARP-1 or MM.1S cells. At 3 to 4 weeks later when palpable tumors (5 mm in diameter) developed, mice ( $n = 4$  per group) were intraperitoneally injected with BTZ (0.1 mg/kg), subcutaneously injected around tumors with anti- $\beta_2$ M mAbs (0.6 mg/kg), either singly or in combination every 3 days for 3 weeks. Control mice were injected with equal amounts of mouse IgG1 or DMSO. Tumors were measured every 3 days with calipers, and tumor volumes ( $\text{mm}^3$ ) were calculated as  $(\text{width}^2 \times \text{length})/2$ . Mice were humanely sacrificed when moribund or when subcutaneous tumors reached 15 mm in diameter. All mice were maintained in facilities accredited by the American Association of Laboratory Animal Care, and the studies were approved by the Institutional Animal Care and Use Committees of The University of Texas MD Anderson Cancer Center and Cleveland Clinic.

## *In situ* apoptosis assay and immunohistochemistry

*In situ* tumor cell apoptosis was determined by using a TUNEL assay kit (Boehringer–Mannheim). Immunohistochemistry was conducted as previously described [46]. Ki67 and cleaved caspase 3 expression were detected using specific antibodies (Cell Signaling Technology). Sectioned tumor tissue was embedded in paraffin. Three slides from each treatment group were evaluated. Six fields were arbitrarily selected for examination, using a defined rectangular field area at  $\times 200$  magnification, and positive staining cells were counted in each field.

## Statistical analysis

The Student's *t*-test was used to compare various experimental groups. A *P* value  $< 0.05$  was considered statistically significant. Unless otherwise indicated, the values provided are means and standard deviations (SD).

## ACKNOWLEDGMENTS

We thank The University of Texas MD Anderson Cancer Center and Cleveland Clinic Myeloma Tissue Bank for providing patient samples. This work was supported by funds from the Center for Targeted Therapy at The University of Texas MD Anderson Cancer Center (Q. Yi), grants from the National Cancer Institute R01 CA138402, R01 CA138398, R01 CA163881, and P50 CA142509 (Q. Yi), and K99/R00 CA137158 (J. Yang), the Leukemia and Lymphoma Society (Q. Yi), the Multiple Myeloma Research Foundation (Q. Yi), the Commonwealth Foundation for Cancer Research (Q. Yi), American Society of Hematology (J. Yang), and the National Natural Science Foundation of China Grant No. 81470356 (J. Yang).

## Authorship

Contribution: MZ, QY, and JY initiated the work, designed the experiments, and wrote the paper. MZ, JH, ZL, YL, YZ, and HLi performed the experiments and statistical analyses. JX, HLi, JQ, RO, and LK provided samples and critical suggestions.

## CONFLICT OF INTEREST

The authors declare no competing financial interests.

## REFERENCES

1. Yaccoby S, Barlogie B, Epstein J. Primary myeloma cells growing in SCID-hu mice: a model for studying the biology and treatment of myeloma and its manifestations. *Blood*. 1998; 92:2908–2913.

2. Kirshner J, Thulien KJ, Martin LD, Debes Marun C, Reiman T, Belch AR, Pilarski LM. A unique three-dimensional model for evaluating the impact of therapy on multiple myeloma. *Blood*. 2008; 112:2935–2945.
3. Kyle RA, Rajkumar SV. Multiple myeloma. *N Engl J Med*. 2004; 351:1860–1873.
4. Cao B, Li J, Mao X. Dissecting bortezomib: development, application, adverse effects and future direction. *Curr Pharm Des*. 2013; 19:3190–3200.
5. Chen D, Frezza M, Schmitt S, Kanwar J, Dou QP. Bortezomib as the first proteasome inhibitor anticancer drug: current status and future perspectives. *Curr Cancer Drug Targets*. 2011; 11:239–253.
6. Rubinstein AD, Kimchi A. Life in the balance—a mechanistic view of the crosstalk between autophagy and apoptosis. *J Cell Sci*. 2012; 125:5259–5268.
7. Gordy C, He YW. The crosstalk between autophagy and apoptosis: where does this lead? *Protein Cell*. 2012; 3:17–27.
8. Djavaheri-Mergny M, Maiuri MC, Kroemer G. Cross talk between apoptosis and autophagy by caspase-mediated cleavage of Beclin 1. *Oncogene*. 2010; 29:1717–1719.
9. Rzymiski T, Milani M, Singleton DC, Harris AL. Role of ATF4 in regulation of autophagy and resistance to drugs and hypoxia. *Cell Cycle*. 2009; 8:3838–3847.
10. Selimovic D, Porzig BB, El-Khattouti A, Badura HE, Ahmad M, Ghanjati F, Santourlidis S, Haikel Y, Hassan M. Bortezomib/proteasome inhibitor triggers both apoptosis and autophagy-dependent pathways in melanoma cells. *Cell Signal*. 2013; 25:308–318.
11. Jia L, Gopinathan G, Sukumar JT, Gribben JG. Blocking autophagy prevents bortezomib-induced NF-kappaB activation by reducing I-kappaBalpha degradation in lymphoma cells. *PLoS One*. 2012; 7:e32584.
12. Tai YT, Li X, Tong X, Santos D, Otsuki T, Catley L, Tournilhac O, Podar K, Hideshima T, Schlossman R, Richardson P, Munshi NC, Luqman M, Anderson KC. Human anti-CD40 antagonist antibody triggers significant antitumor activity against human multiple myeloma. *Cancer Res*. 2005; 65:5898–5906.
13. Tai YT, Li XF, Catley L, Coffey R, Breitkreutz I, Bae J, Song W, Podar K, Hideshima T, Chauhan D, Schlossman R, Richardson P, Treon SP, Grewal IS, Munshi NC, Anderson KC. Immunomodulatory drug lenalidomide (CC-5013, IMiD3) augments anti-CD40 SGN-40-induced cytotoxicity in human multiple myeloma: clinical implications. *Cancer Res*. 2005; 65:11712–11720.
14. Tassone P, Galea E, Forciniti S, Tagliaferri P, Venuta S. The IL-6 receptor super-antagonist Sant7 enhances antiproliferative and apoptotic effects induced by dexamethasone and zoledronic acid on multiple myeloma cells. *Int J Oncol*. 2002; 21:867–873.
15. Ozaki S, Kosaka M, Wakahara Y, Ozaki Y, Tsuchiya M, Koishihara Y, Goto T, Matsumoto T. Humanized anti-HM1.24 antibody mediates myeloma cell cytotoxicity that is enhanced by cytokine stimulation of effector cells. *Blood*. 1999; 93:3922–3930.
16. Tai YT, Horton HM, Kong SY, Pong E, Chen H, Cemerski S, Bennett MJ, Nguyen DH, Karki S, Chu SY, Lazar GA, Munshi NC, Desjarlais JR, Anderson KC, Muchhal US. Potent *in vitro* and *in vivo* activity of an Fc-engineered humanized anti-HM1.24 antibody against multiple myeloma via augmented effector function. *Blood*. 2012; 119:2074–2082.
17. Stein R, Mattes MJ, Cardillo TM, Hansen HJ, Chang CH, Burton J, Govindan S, Goldenberg DM. CD74: a new candidate target for the immunotherapy of B-cell neoplasms. *Clin Cancer Res*. 2007; 13:5556s–5563s.
18. Kim D, Wang J, Willingham SB, Martin R, Wernig G, Weissman IL. Anti-CD47 antibodies promote phagocytosis and inhibit the growth of human myeloma cells. *Leukemia*. 2012; 26:2538–2545.
19. Menoret E, Gomez-Bougie P, Geffroy-Luseau A, Daniels S, Moreau P, Le Gouill S, Harousseau JL, Bataille R, Amiot M, Pellat-Deceunynck C. Mcl-1L cleavage is involved in TRAIL-R1- and TRAIL-R2-mediated apoptosis induced by HGS-ETR1 and HGS-ETR2 human mAbs in myeloma cells. *Blood*. 2006; 108:1346–1352.
20. Tai YT, Dillon M, Song W, Leiba M, Li XF, Burger P, Lee AI, Podar K, Hideshima T, Rice AG, van Abbema A, Jesaitis L, Caras I, Law D, Weller E, Xie W, et al. Anti-CS1 humanized monoclonal antibody HuLuc63 inhibits myeloma cell adhesion and induces antibody-dependent cellular cytotoxicity in the bone marrow milieu. *Blood*. 2008; 112:1329–1337.
21. Rosenblatt J, Glotzbecker B, Mills H, Vasir B, Tzachanis D, Levine JD, Joyce RM, Wellenstein K, Keefe W, Schickler M, Rotem-Yehudar R, Kufe D, Avigan D. PD-1 blockade by CT-011, anti-PD-1 antibody, enhances *ex vivo* T-cell responses to autologous dendritic cell/myeloma fusion vaccine. *J Immunother*. 2011; 34:409–418.
22. Tassone P, Gozzini A, Goldmacher V, Shammas MA, Whiteman KR, Carrasco DR, Li C, Allam CK, Venuta S, Anderson KC, Munshi NC. *In vitro* and *in vivo* activity of the maytansinoid immunoconjugate huN901-N2'-deacetyl-N2'-(3-mercapto-1-oxopropyl)-maytansine against CD56+ multiple myeloma cells. *Cancer Res*. 2004; 64:4629–4636.
23. Ikeda H, Hideshima T, Fulciniti M, Lutz RJ, Yasui H, Okawa Y, Kiziltepe T, Vallet S, Pozzi S, Santo L, Perrone G, Tai YT, Cirstea D, Raje NS, Uherek C, Dalken B, et al. The monoclonal antibody nBT062 conjugated to cytotoxic Maytansinoids has selective cytotoxicity against CD138-positive multiple myeloma cells *in vitro* and *in vivo*. *Clin Cancer Res*. 2009; 15:4028–4037.

24. Bjorkman PJ, Burmeister WP. Structures of two classes of MHC molecules elucidated: crucial differences and similarities. *Curr Opin Struct Biol.* 1994; 4:852–856.
25. Yang J, Qian J, Wezeman M, Wang S, Lin P, Wang M, Yaccoby S, Kwak LW, Barlogie B, Yi Q. Targeting beta2-microglobulin for induction of tumor apoptosis in human hematological malignancies. *Cancer Cell.* 2006; 10:295–307.
26. Zhang M, Qian J, Lan Y, Lu Y, Li H, Hong B, Zheng Y, He J, Yang J, Yi Q. Anti-beta(2)M monoclonal antibodies kill myeloma cells via cell- and complement-mediated cytotoxicity. *Int J Cancer.* 2014; 135:1132–1141.
27. Yang J, Cao Y, Hong S, Li H, Qian J, Kwak LW, Yi Q. Human-like mouse models for testing the efficacy and safety of anti-beta2-microglobulin monoclonal antibodies to treat myeloma. *Clin Cancer Res.* 2009; 15:951–959.
28. Sekimoto E, Ozaki S, Ohshima T, Shibata H, Hashimoto T, Abe M, Kimura N, Hattori K, Kawai S, Kinoshita Y, Yamada-Okabe H, Tsuchiya M, Matsumoto T. A single-chain Fv diabody against human leukocyte antigen-A molecules specifically induces myeloma cell death in the bone marrow environment. *Cancer Res.* 2007; 67:1184–1192.
29. Nomura T, Huang WC, Seo S, Zhou HE, Mimata H, Chung LW. Targeting beta2-microglobulin mediated signaling as a novel therapeutic approach for human renal cell carcinoma. *J Urol.* 2007; 178:292–300.
30. Huang WC, Wu D, Xie Z, Zhou HE, Nomura T, Zayzafoon M, Pohl J, Hsieh CL, Weitzmann MN, Farach-Carson MC, Chung LW. beta2-microglobulin is a signaling and growth-promoting factor for human prostate cancer bone metastasis. *Cancer Res.* 2006; 66:9108–9116.
31. Kuhn DJ, Berkova Z, Jones RJ, Woessner R, Bjorklund CC, Ma W, Davis RE, Lin P, Wang H, Madden TL, Wei C, Baladandayuthapani V, Wang M, Thomas SK, Shah JJ, Weber DM, et al. Targeting the insulin-like growth factor-1 receptor to overcome bortezomib resistance in preclinical models of multiple myeloma. *Blood.* 2012; 120:3260–3270.
32. Driscoll JJ, Chowdhury RD. Molecular crosstalk between the proteasome, aggregates and autophagy: translational potential and clinical implications. *Cancer Lett.* 2012; 325:147–154.
33. Markovina S, Callander NS, O'Connor SL, Kim J, Wernli JE, Raschko M, Leith CP, Kahl BS, Kim K, Miyamoto S. Bortezomib-resistant nuclear factor-kappaB activity in multiple myeloma cells. *Mol Cancer Res.* 2008; 6:1356–1364.
34. Yang DT, Young KH, Kahl BS, Markovina S, Miyamoto S. Prevalence of bortezomib-resistant constitutive NF-kappaB activity in mantle cell lymphoma. *Mol Cancer.* 2008; 7:40.
35. Zheng Y, Yang J, Qian J, Zhang L, Lu Y, Li H, Lin H, Lan Y, Liu Z, He J, Hong S, Thomas S, Shah J, Baladandayuthapani V, Kwak LW, Yi Q. Novel phosphatidylinositol 3-kinase inhibitor NVP-BKM120 induces apoptosis in myeloma cells and shows synergistic anti-myeloma activity with dexamethasone. *J Mol Med.* 2012; 90:695–706.
36. Suzuki K. Current therapeutic strategy for multiple myeloma. *Jap J Clin Oncol.* 2013; 43:116–124.
37. Chou T. Multiple myeloma: recent progress in diagnosis and treatment. *J Clin Exp Hematopathol.* 2012; 52:149–159.
38. Romano A, Conticello C, Di Raimondo F. Bortezomib for the treatment of previously untreated multiple myeloma. *Immunotherapy.* 2013; 5:327–352.
39. Lawasut P, Chauhan D, Laubach J, Hayes C, Fabre C, Maglio M, Mitsiades C, Hideshima T, Anderson KC, Richardson PG. New proteasome inhibitors in myeloma. *Curr Hematol Malig Rep.* 2012; 7:258–266.
40. Allegra A, Penna G, Alonci A, Russo S, Greve B, Innaro V, Minardi V, Musolino C. Monoclonal antibodies: potential new therapeutic treatment against multiple myeloma. *Eur J Haematol.* 2013; 90:441–468.
41. Hideshima T, Ikeda H, Chauhan D, Okawa Y, Raje N, Podar K, Mitsiades C, Munshi NC, Richardson PG, Carrasco RD, Anderson KC. Bortezomib induces canonical nuclear factor-kappaB activation in multiple myeloma cells. *Blood.* 2009; 114:1046–1052.
42. Sarosiek KA, Cavallin LE, Bhatt S, Toomey NL, Natkunam Y, Blasini W, Gentles AJ, Ramos JC, Mesri EA, Lossos IS. Efficacy of bortezomib in a direct xenograft model of primary effusion lymphoma. *Proc Natl Acad Sci U S A.* 2010; 107:13069–13074.
43. Copetti T, Demarchi F, Schneider C. p6/RelA binds and activates the beclin 1 promoter. *Autophagy.* 2009; 5:858–859.
44. Hardin J, MacLeod S, Grigorieva I, Chang R, Barlogie B, Xiao H, Epstein J. Interleukin-6 prevents dexamethasone-induced myeloma cell death. *Blood.* 1994; 84:3063–3070.
45. Huang CJ, Bi EG, Hu Y, Deng WW, Tian ZG, Dong C, Hu YJ, Sun B. A novel NF-kappa B binding site controls human granzyme B gene transcription. *J Immunol.* 2006; 176:4173–4181.
46. Chen S, Zhang M, Ma H, Saiyin H, Shen S, Xi J, Wan B, Yu L. Oligo-microarray analysis reveals the role of cyclophilin A in drug resistance. *Cancer Chemother Pharmacol.* 2008; 61:459–469.
