# Supplementary material for: Anti-β2-microglobulin monoclonal antibodies overcome bortezomib resistance in multiple myeloma by inhibiting autophagy
Source: PubMed Central journal article supplement (PMC4496167; doi:10.18632/oncotarget.3251), 2015-03-31
Supplement: oncotarget-06-8567-s001.pdf [file oncotarget-06-8567-s001.pdf]

## SUPPLEMENTARY FIGURES

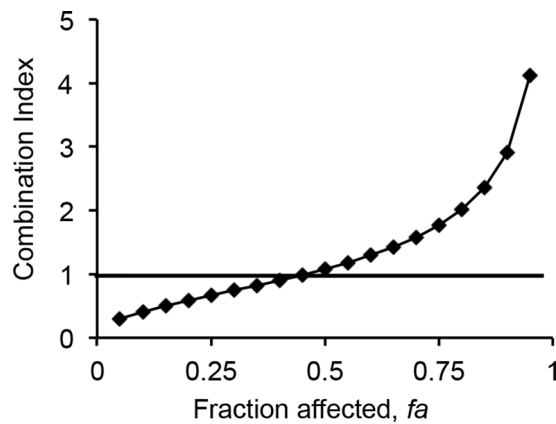

**Supplementary Figure S1: Combination Index (CI) isobol equation to study drug interactions between BTZ and anti- $\beta_2M$  mAbs.** The CI theory of Chou-Talalay offers quantitative definitions for additive effect ( $CI = 1$ ), synergism ( $CI < 1$ ), and antagonism ( $CI > 1$ ) in determining the effect of drug combinations. The combination of BTZ and anti- $\beta_2M$  mAbs has a synergistic effect ( $CI < 1$ ) when combined at low concentrations.

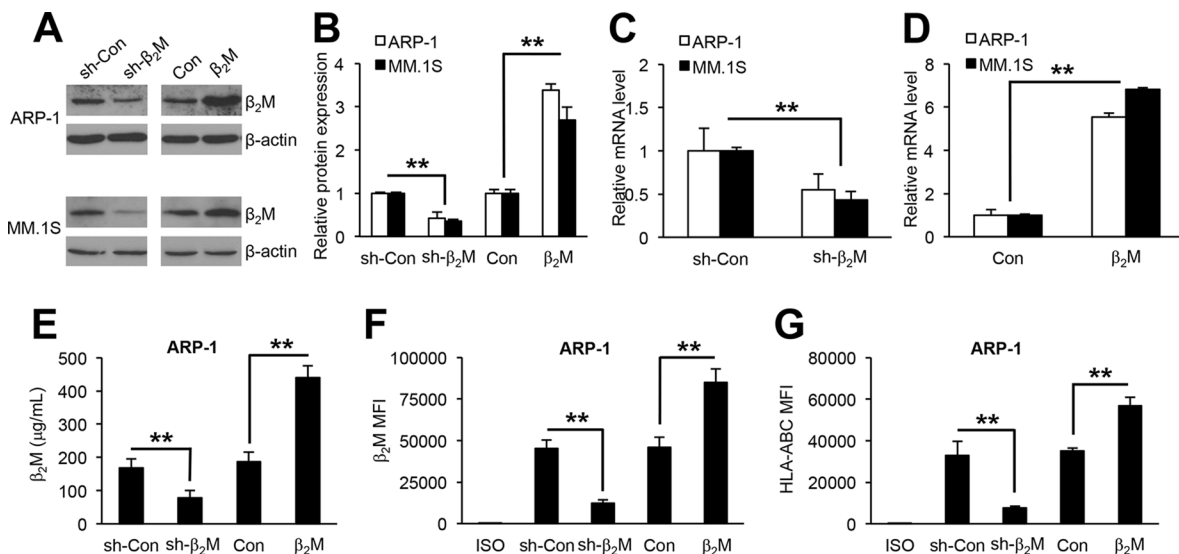

**Supplementary Figure S2: Establishment of  $\beta_2M$  knockdown and overexpression of stable ARP-1 and MM.1S cell lines.** Representative images (A) and quantification (B) of Western blot analysis showing the protein levels of  $\beta_2M$  in stable non-specific (sh-con) or  $\beta_2M$  shRNA (sh- $\beta_2M$ )-expressing, and in stable control vector (con) or human  $\beta_2M$  cDNA ( $\beta_2M$ )-expressing ARP-1 and MM.1S cells.  $\beta$ -actin served as protein loading control. qPCR showing the relative mRNA levels of the  $\beta_2M$  gene in the  $\beta_2M$  knockdown (C) and overexpression (D) ARP-1 and MM.1S cells. *GAPDH* mRNA served as an internal control. (E) Secreted  $\beta_2M$  level in medium from cultured  $\beta_2M$  knockdown or overexpression ARP-1 cells, as detected by ELISA. Also shown are the mean fluorescence intensity (MFI) for the cell surface expression of  $\beta_2M$  (F) and HLA-ABC (G) on  $\beta_2M$ -knockdown or  $\beta_2M$ -overexpressing ARP-1 cells, as detected by flow cytometry. Isotype antibodies (ISO) served as controls. Summarized data from three independent experiments are shown.  $**P < 0.01$ .

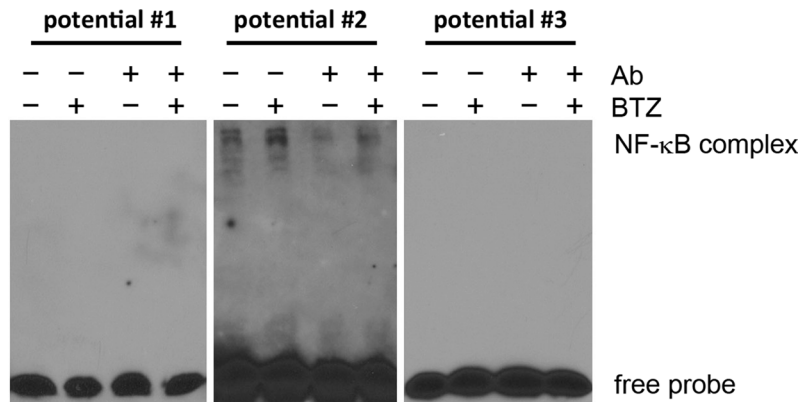

**Supplementary Figure S3: Gel shift activities induced by combination treatment with three potential NF-κB binding sites on *beclin 1* promoter.** Potential #2 probe bound nuclear proteins of ARP-1 cell nuclear extracts after 24-h treatment with BTZ (5 nM) or anti-β<sub>2</sub>M mAbs (10 μg/mL), singly or in combination, whereas binding was not present with potential #1 and potential #3 probes.

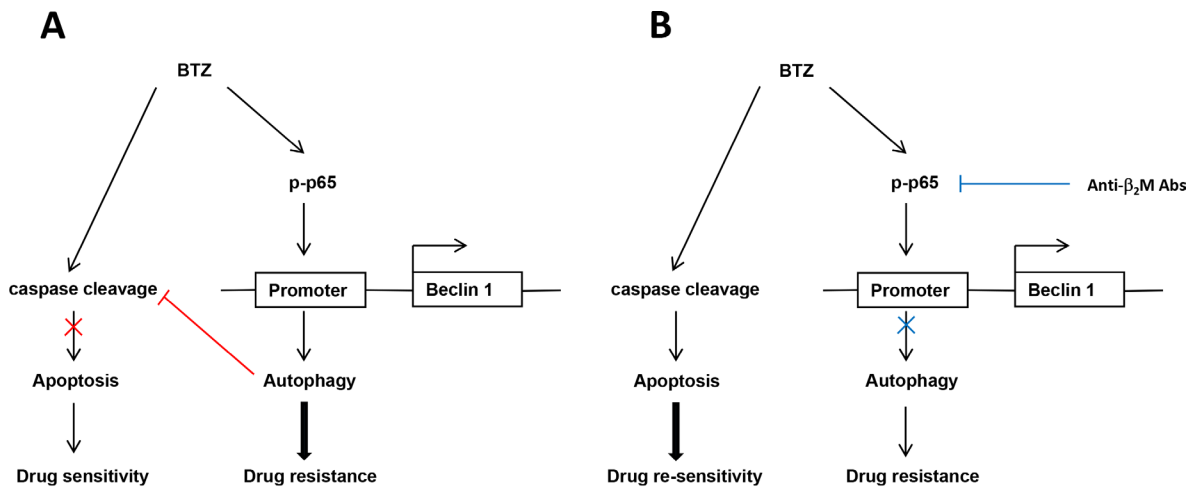

**Supplementary Figure S4: Schematic diagram of the mechanism proposed to underly the ability of anti-β<sub>2</sub>M mAb to overcome MM drug resistance against BTZ.** (A) Proposed mechanism by which BTZ increases caspase cleavage and induces MM cell apoptosis to result in MM cell drug sensitivity to BTZ. However, BTZ could also enhance *beclin 1* transcription via phosphorylating NF-κB p65, activating autophagy, and inhibiting caspase cleavage and cell apoptosis, resulting in drug resistance to BTZ. (B) The mechanism by which anti-β<sub>2</sub>M mAbs and BTZ combination treatment inhibits BTZ-induced phosphorylation of NF-κB p65 and autophagy, and increases caspase cleavage and cell apoptosis to resensitize cells to BTZ.
